# Supplementary material for: R-Ras-Akt axis induces endothelial lumenogenesis and regulates the patency of regenerating vasculature
Source: PubMed Central journal article supplement (PMC5700916; doi:10.1038/s41467-017-01865-x), 2017-11-23
Supplement: 41467_2017_1865_MOESM3_ESM.pdf [file 41467_2017_1865_MOESM3_ESM.pdf]

### **Description of Supplementary Files**

File name: Supplementary Movie 1

Description: Confocal 3-D image of control endothelial sprout

File name: Supplementary Movie 2

Description: Confocal 3-D image of R-Ras38V-expressing endothelial sprout
